# Supplementary material for: Dynamic Changes in Flavor and Microbiota in Traditionally Fermented Bamboo Shoots (Chimonobambusa szechuanensis (Rendle) Keng f.)
Source: MDPI journal article supplement (doi:10.3390/foods12163035), 2023-08-12
Supplement: s1 [file s1]

## Supplementary data

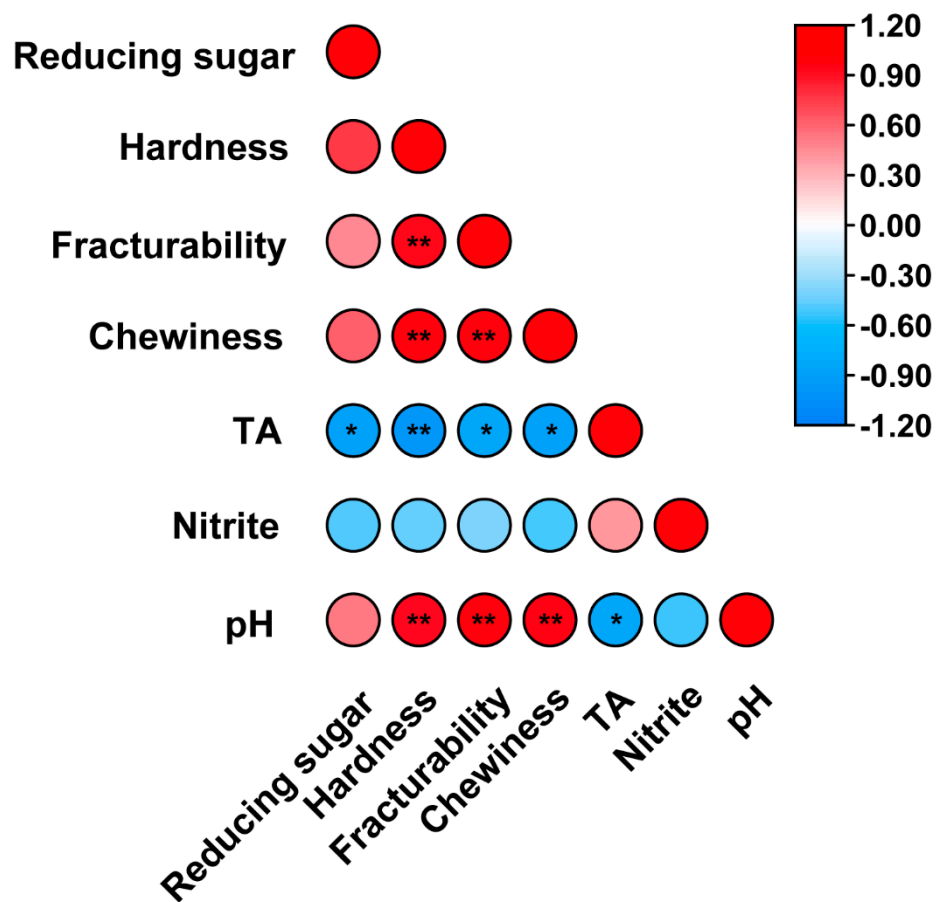

**Figure S1** Correlation among reducing sugar, hardness, fracturability, chewiness, TA, pH, and nitrite of sour bamboo shoots conducted by Pearson's correlation analysis.

Circles represent a positive (orange) or negative (blue) correlation between the quality indicators. The size of the circle represents the levels of the correlation coefficient (r),

\*  $P < 0.05$ , \*\*  $P < 0.01$ .

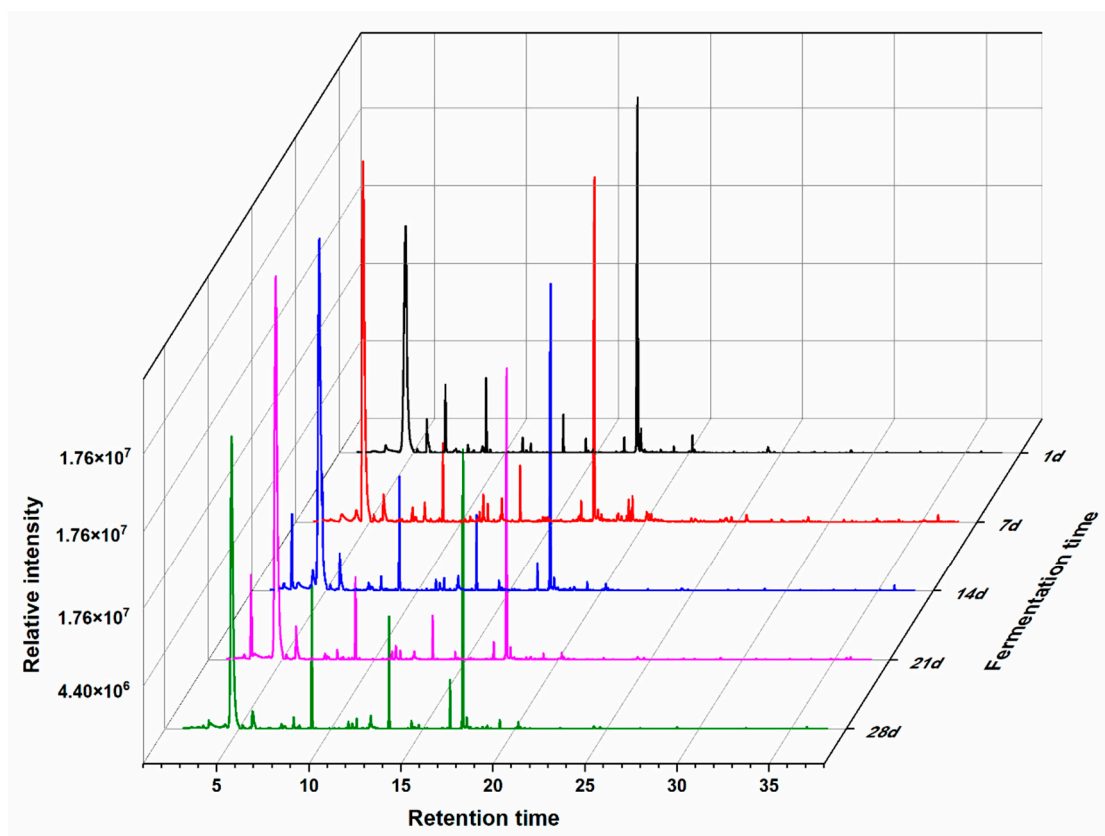

**Figure S2** Total ion flow of volatile compounds in sour bamboo shoots during the fermentation process.

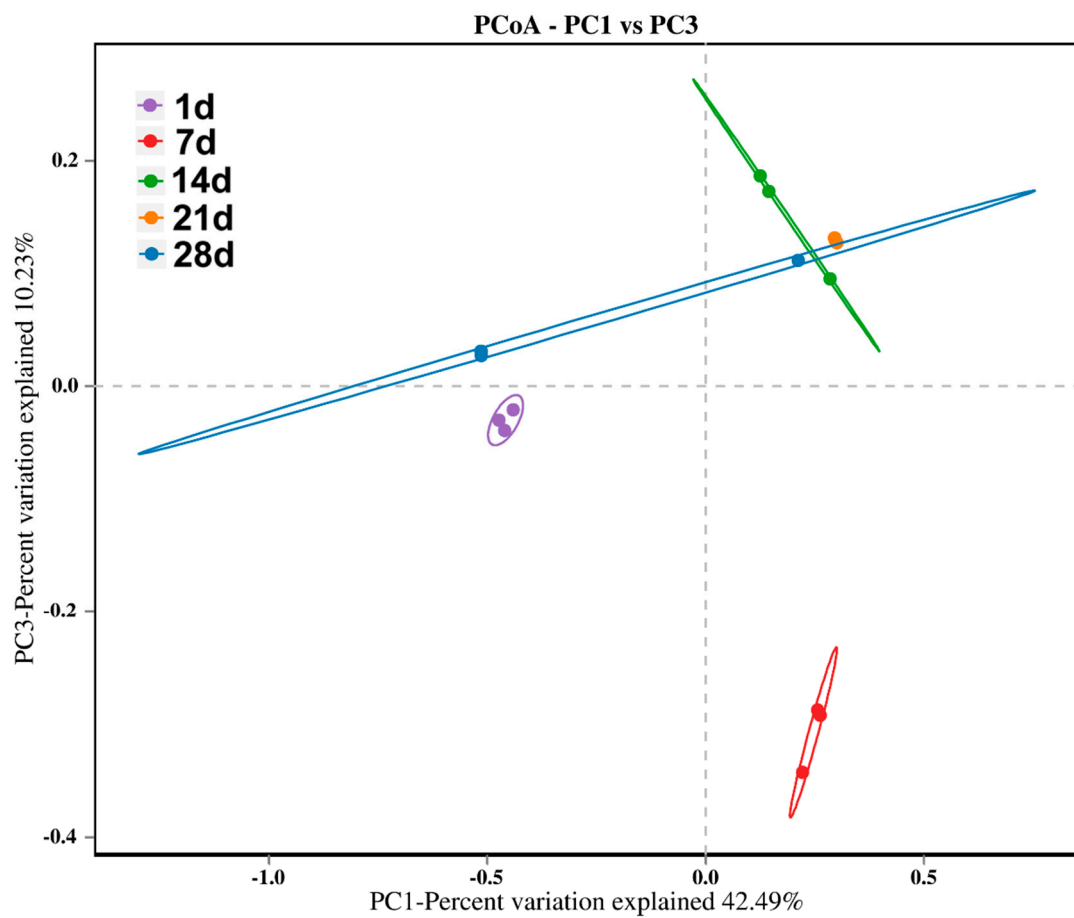

**Figure S3** PCoA analysis of the microbial community in sour bamboo shoots during fermentation process.

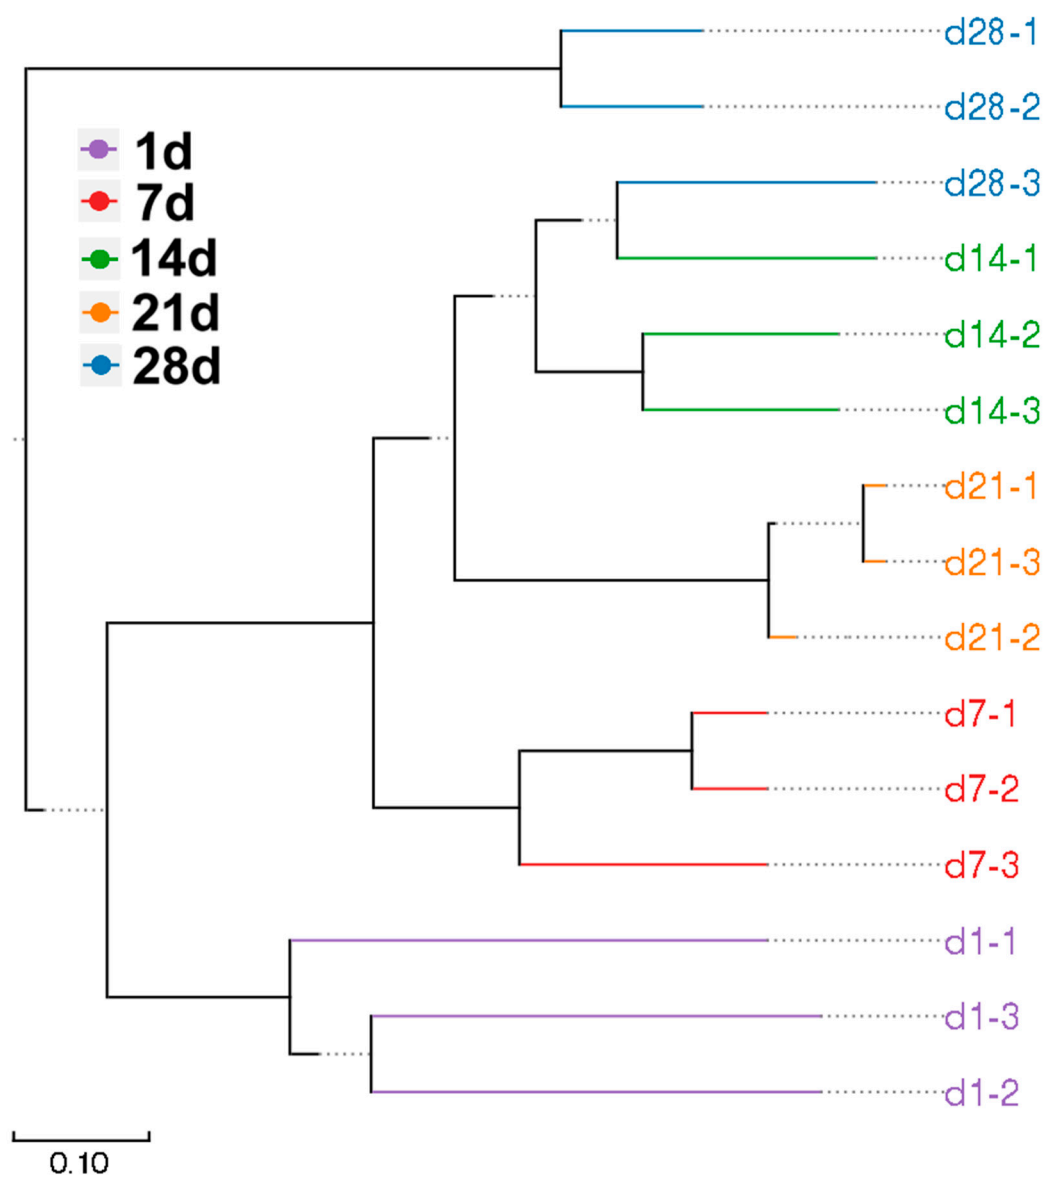

**Figure S4** UPGMA analysis of the microbial community in sour bamboo shoots during fermentation process.

**Table S1** Volatile compounds of sour bamboo shoots during fermentation measure by GC-MS.

| NO.      | Volatile components                                         | Relative content (μg/L) |              |               |              |               |
|----------|-------------------------------------------------------------|-------------------------|--------------|---------------|--------------|---------------|
|          |                                                             | 1d                      | 7d           | 14d           | 21d          | 28d           |
| Alcohols |                                                             |                         |              |               |              |               |
| 1        | 1-Heptanol                                                  | -                       | -            | 8.05±0.77b    | -            | -             |
| 2        | 1-Octen-3-ol                                                | 101.10 ±0.00b           | -            | -             | -            | 117.68±10.33a |
| 3        | 2-Ethyl-1-hexanol                                           | 50.54 ±0.00a            | 14.40±1.13b  | 8.07±0.72d    | 7.20±1.85d   | -             |
| 4        | (E)-2-Octen-1-ol                                            | 8.98±12.70a             | 18.63±2.06a  | 14.43±1.26a   | 13.77±3.38a  | 11.55±1.75a   |
| 5        | 1-Octanol                                                   | -                       | -            | -             | -            | 14.06±3.91a   |
| 6        | Linalool                                                    | 1.36±1.92c              | -            | 4.13±0.34c    | 4.36±0.10c   | 8.96±0.00b    |
| 7        | 3,6-Nonadien-1-ol                                           | 0.84±1.18e              | 104.85±5.34b | 76.60±6.16cd  | 69.56±4.52d  | 87.49±2.39c   |
| 8        | 1-Decanol                                                   | -                       | 2.88±0.39a   | 1.43±0.32b    | 1.90±0.20    | 3.84±0.34a    |
| 9        | 1-Pentanol                                                  | 74.48±0.00a             | 18.26±1.10b  | -             | -            | -             |
| 10       | dimethylsilanediol                                          | 1.74 ±0.00c             | -            | 317.50±58.65b | 74.05±33.15a | 422.08±0.00a  |
| 11       | 1-Nonanol                                                   | 2.01 ±0.15c             | 6.10±0.51a   | 3.09±0.18b    | 3.07±0.42b   | 2.69±0.58bc   |
| 12       | 1-Dodecanol                                                 | 2.43 ±0.00b             | 9.77±0.64a   | 2.16±0.33b    | 1.56±0.11b   | 2.49±0.69b    |
| 13       | 3-Methyl-1-butanol                                          | 14.85 ±0.00c            | 23.66±1.44b  | -             | -            | -             |
| 14       | Cyclooctyl alcohol                                          | 8.99 ±0.00b             | -            | -             | -            | -             |
| 15       | Cedrol                                                      | 3.10 ±0.00c             | 13.99±0.92a  | 2.28±0.34c    | 2.55±0.72c   | 2.61±0.65c    |
| 16       | Cyclohexanol, 2-methyl-                                     | -                       | 7.70±0.35a   | 1.37±0.00b    | -            | -             |
| 17       | Bicyclo[3.1.1]heptane-2-methanol,6,6-dimethyl-, (1S,2S,5S)- | -                       | -            | -             | -            | 5.49±0.00b    |
| Esters   |                                                             |                         |              |               |              |               |
| 18       | 2,2,4-Trimethyl-1,3-pentanediol diisobutyrate               | 7.74±3.32c              | 25.65±3.34a  | 17.14±0.16b   | 14.73±1.50bc | 14.45±1.96bc  |

|           |                                                                         |                 |                |                 |                 |                  |
|-----------|-------------------------------------------------------------------------|-----------------|----------------|-----------------|-----------------|------------------|
| 19        | Propanoic acid, 2-methyl-, 3-hydroxy-2,2,4-trimethylpentyl ester        | 3.42±1.43c      | 18.70±1.13a    | 7.83±1.82b      | 3.94±0.32c      | 5.16±0.53bc      |
| 20        | Hexanoic acid, 3,5,5-trimethyl-, 2-ethylhexyl ester                     | 9.94±0.72b      | 17.86±0.80a    | 8.80±1.21b      | 4.34±0.31c      | 8.25±0.85b       |
| 21        | 1,2-Benzenedicarboxylic acid, bis(2-methylpropyl) ester                 | 17.74±11.54bc   | 22.24±0.58b    | 50.35±2.61a     | 10.96±2.22c     | 25.54±0.68b      |
| 22        | Dibutyl phthalate                                                       | 15.36±10.21b    | 13.24±0.84b    | 25.04±0.00a     | 13.69±0.00b     | 8.38±0.00b       |
| 23        | Formic acid, octyl ester                                                | -               | 21.83±1.34a    | 15.08±0.82b     | 11.41±0.92c     | -                |
| 24        | Hexadecanoic acid, methyl ester                                         | -               | -              | -               | -               | 2.27±0.00b       |
| Aldehydes |                                                                         |                 |                |                 |                 |                  |
| 25        | Octanal                                                                 | 2.50±1.31b      | 5.27±0.38a     | 1.56±0.28b      | 1.43±0.22b      | 2.32±0.12b       |
| 26        | Nonanal                                                                 | 9.62±4.01c      | 16.30±0.11ab   | 8.76±1.29c      | 19.36±0.57a     | 17.26±1.78a      |
| 27        | Decanal                                                                 | 5.37±0.75bc     | 13.11±1.01a    | 4.21±0.13cd     | 3.41±0.00d      | 4.27±0.20cd      |
| 28        | Benzaldehyde, 2,4-dimethyl-                                             | 25.95±3.87d     | 133.77±7.15a   | 39.74±4.13c     | 69.28±2.71b     | 33.41±1.58cd     |
| 29        | Dodecanal                                                               | 0.98±0.37d      | 5.95±0.33a     | 2.60±0.19b      | 2.09±0.30c      | 1.22±0.06d       |
| Phenols   |                                                                         |                 |                |                 |                 |                  |
| 30        | 2,4-Di-tert-butylphenol                                                 | 2249.37±236.93a | 1353.07±70.59e | 1417.76±73.07de | 1692.12±65.90cd | 1939.50±143.94bd |
| 31        | 2-Methoxy-4-vinylphenol                                                 | -               | 4.94±0.26c     | -               | 6.19±0.22c      | 36.95±0.00a      |
| 32        | Phenol, 2,5-bis(1,1-dimethylethyl)                                      | -               | 2.49±0.00c     | 2.48±0.00d      | 2.42±0.00e      | 4.50±0.00a       |
| Ketones   |                                                                         |                 |                |                 |                 |                  |
| 33        | Isophorone                                                              | 70.16±15.37b    | 21.06±0.86c    | -               | -               | 7.82±0.00d       |
| 34        | 3-Hepten-2-one, 5-ethyl-6-methyl-                                       | 13.55±2.00a     | 6.29±0.59bc    | 5.17±0.47bc     | -               | 4.85±0.67c       |
| 35        | 2,5-Cyclohexadien-1-one, 2,6-bis(1,1-dimethylethyl)-4-hydroxy-4-methyl- | 4.27±1.28b      | 6.62±0.48a     | 3.48±0.29b      | -               | 6.45±0.44a       |
| 36        | 2,5-Cyclohexadiene-1,4-dione, 2,6-bis(1,1-dimethylethyl)-               | 4.82±0.34b      | 6.25±0.27a     | 2.97±0.13c      | -               | 2.89±0.05c       |
| 37        | 7,9-ditert-butyl-1-oxaspiro[4.5]deca-6,9-diene-2,8-dione                | 13.45±7.38a     | -              | -               | -               | 0.10±0.00b       |
| 38        | Cyclohexanone, 2-cyclohexylidene-                                       | 1.29±0.00bc     | 5.92±0.02a     | 3.26±0.88abc    | -               | 4.69±0.13ab      |
| Others    |                                                                         |                 |                |                 |                 |                  |
| 39        | D-Limonene                                                              | 354.21±33.00a   | 10.45±0.38b    | 2.41±0.45b      | -               | 3.22±0.09b       |
| 40        | Naphthalene                                                             | 5.13±0.35cd     | 25.45±2.02a    | 7.78±0.00c      | 5.71±0.74cd     | 2.98±0.32d       |

|       |                        |   |              |              |            |             |
|-------|------------------------|---|--------------|--------------|------------|-------------|
| 41    | p-Xylene               | - | 139.10±4.38b | 215.11±4.17a | -          | 37.43±2.36c |
| 42    | Benzene, 1,3-dimethyl- | - | 2.72±0.75e   | 5.62±0.82d   | 6.49±0.00c | 8.54±0.27a  |
| Acids |                        |   |              |              |            |             |
| 43    | Acetic acid            | - | -            | 31.32±9.79   | -          | -           |

-: not detected.

Different letters in same row indicate significant differences between groups ( $P < 0.05$ ).

**Table S2** Alpha diversity of the microbial community in sour bamboo shoots during the fermentation process.

|     | Chao1             | ACE               | Shannon      | Simpson      | Coverage |
|-----|-------------------|-------------------|--------------|--------------|----------|
| 1d  | 1454.07 ± 269.71a | 1454.82 ± 269.79a | 9.06 ± 0.28a | 0.99 ± 0.00a | 0.99     |
| 7d  | 444.67 ± 52.85b   | 444.89 ± 52.96b   | 4.34 ± 0.15b | 0.88 ± 0.01b | 1.0      |
| 14d | 473.38 ± 165.44b  | 473.48 ± 165.49b  | 4.71 ± 0.67b | 0.88 ± 0.02b | 1.0      |
| 21d | 141.04 ± 11.02c   | 141.50 ± 10.96c   | 3.66 ± 0.03c | 0.86 ± 0.00b | 1.0      |
| 28d | 493.35 ± 78.11b   | 493.44 ± 78.20b   | 2.87 ± 1.03d | 0.57 ± 0.17c | 1.0      |
